# Supplementary material for: Polysulfides Applied as Formulated Garlic Extract to Protect Tomato Plants against the Root-Knot Nematode Meloidogyne incognita
Source: PubMed Central journal article supplement (PMC7922410; doi:10.3390/plants10020394), 2021-02-18
Supplement: plants-10-00394-s001.pdf [file plants-10-00394-s001.pdf]

## Supplementary Materials

### Supplementary Tables

**Table S1.** Tomato plants root weight and second stage juveniles (J2) hatched from roots grown for 59 days in *Meloidogyne incognita* infested soil treated with NEMguard® DE as single (NEMguard 1) and repeated application (NEMguard 2).

| Treatment  | Root fresh weight (g) | J2 per plant        |
|------------|-----------------------|---------------------|
| nControl   | 20.1 ± 2.0a           | 0                   |
| pControl   | 23.9 ± 4.0a           | 128777.8 ± 31106.0a |
| NEMguard 1 | 19.9 ± 2.8a           | 113138.9 ± 56040.6a |
| NEMguard 2 | 23.4 ± 4.8a           | 76805.6 ± 60023.2a  |

Values are means of n = 6, same letter in the same column indicate no significant differences using a one-way ANOVA (post-hoc Tukey HSD test). NEMguard 1 = NEMguard® DE applied before plant; NEMguard 2 = NEMguard® DE applied before plant followed by a repeated application 24 days after planting. Positive (p) control = control inoculated with *M. incognita*. Negative (n) control = soil free of *M. incognita*.

**Table S2.** Tomato yields from *Meloidogyne incognita* infested plants after treatment with NEMguard® DE from two consecutive years.

| Growth season | Treatments | Average weight g/harvest and plant | Average no. of fruits /harvest and plant | Average fruit weight g/harvest and plant | Total fruit weight per plant (kg) | Yield potential (%) |
|---------------|------------|------------------------------------|------------------------------------------|------------------------------------------|-----------------------------------|---------------------|
| 2019          | nControl   | 1241.5 ± 555.9a                    | 16.6 ± 6.8a                              | 74.8 ± 10.6a                             | 14.9 ± 1.4a                       | 100                 |
|               | pControl   | 1024.8 ± 514.8b                    | 15.9 ± 6.8a                              | 62.7 ± 13.2b                             | 12.3 ± 0.6b                       | 82.5                |
|               | NEMguard 1 | 1037.0 ± 551.7b                    | 15.6 ± 6.8a                              | 61.6 ± 14.8b                             | 12.4 ± 1.0b                       | 83.5                |
|               | NEMguard 2 | 990.5 ± 554.2b                     | 15.1 ± 6.5a                              | 60.4 ± 16.3b                             | 11.9 ± 1.3b                       | 79.8                |
| 2020          | nControl   | 1420.4 ± 500.9a                    | 19.7 ± 5.8a                              | 72.1 ± 12.5a                             | 17.0 ± 1.3a                       | 100                 |
|               | pControl   | 1199.7 ± 470.5b                    | 18.2 ± 5.2a                              | 64.7 ± 14.1a                             | 14.4 ± 1.8b                       | 84.5                |
|               | NEMguard 1 | 1158.0 ± 510.6b                    | 17.2 ± 5.9a                              | 66.0 ± 16.8a                             | 13.9 ± 0.9b                       | 81.5                |
|               | NEMguard 2 | 1268.1 ± 508.8ab                   | 19.2 ± 5.7a                              | 65.8 ± 16.9a                             | 15.2 ± 0.9ab                      | 89.3                |

Values are means/sums of n = 8. Same letter in the same column indicates no significant differences using a one-way ANOVA (post-hoc Tukey HSD test). NEMguard 1 = NEMguard® DE applied before planting; NEMguard 2 = NEMguard® DE applied before planting followed by a repeated application (monthly) after planting. Positive (p) control = control inoculated with *M. incognita*, negative (n) control = soil free of *M. incognita*.

## Supplementary Figures

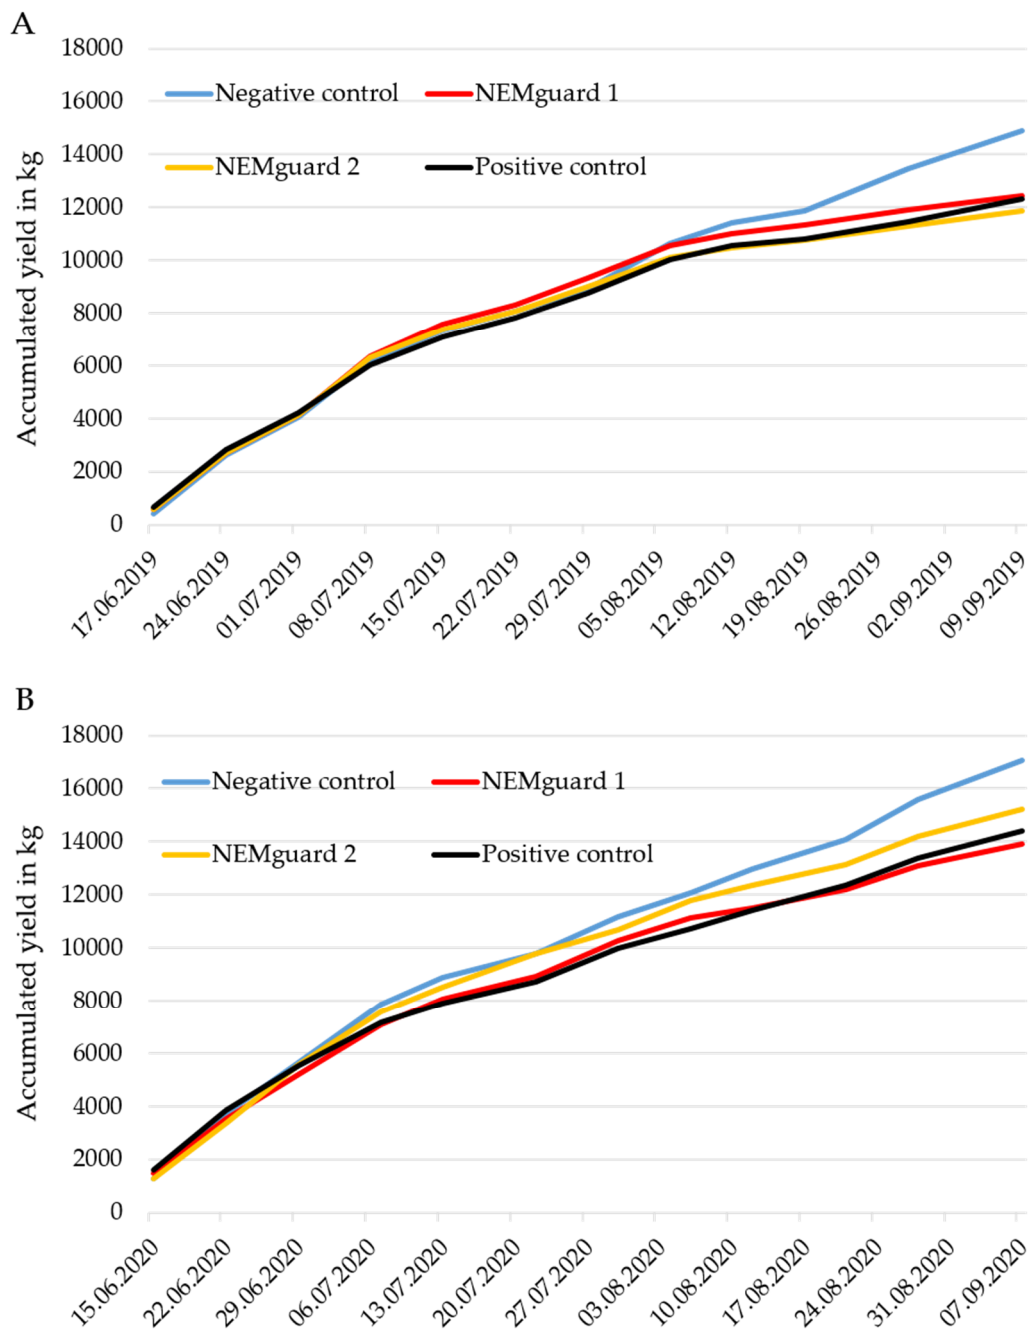

**Figure S1.** Accumulated tomato yield over time from *Meloidogyne incognita* infested plants after treatment with NEMguard® DE from two consecutive years (A=2019 and B=2020). Positive control = control inoculated with *M. incognita*, negative control = soil free of *M. incognita*. NEMguard 1 = NEMguard® DE applied before planting; NEMguard 2 = NEMguard® DE applied before planting followed by repeated monthly applications.
